# Supplementary material for: B7-H3 promotes gastric cancer cell migration and invasion
Source: PubMed Central journal article supplement (PMC5641084; doi:10.18632/oncotarget.17847), 2017-05-13
Supplement: oncotarget-08-71725-s001.pdf [file oncotarget-08-71725-s001.pdf]

## B7-H3 promotes gastric cancer cell migration and invasion

### Supplementary Materials

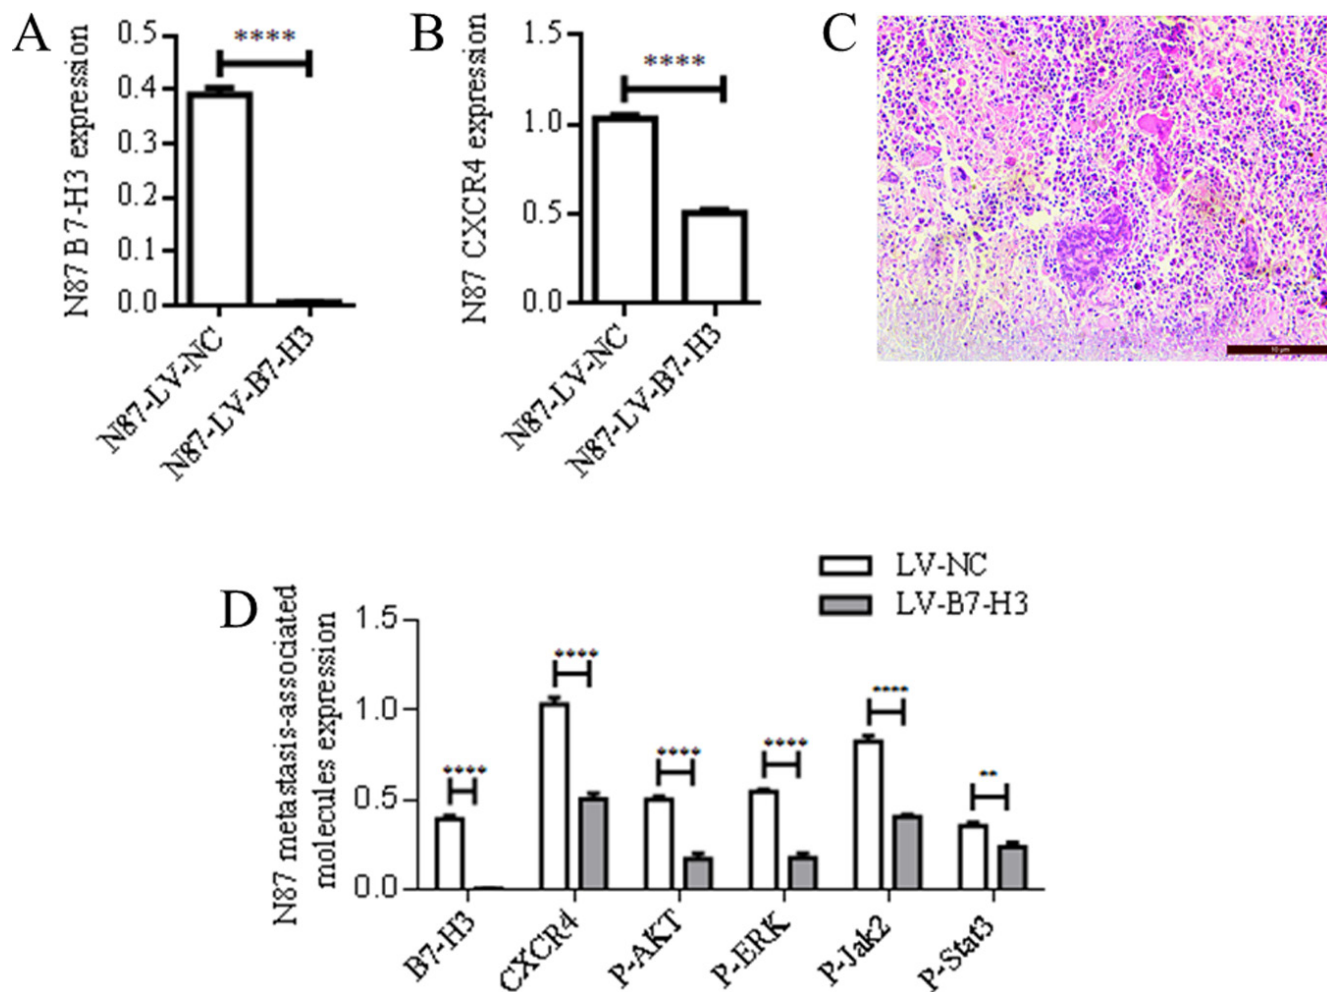

**Supplementary Figure 1: Western blotting band densitometric analyses, and spleen metastasis H&E staining.** B7-H3 (A) and CXCR4 (B) plasma protein band densitometric analyses. H&E staining of spleen metastases in mice injected with B7-H3-silenced or control N87 cells (Magnification, ×200) (C) Metastasis-associated molecule (B7-H3, CXCR4, p-AKT, p-ERK, p-Jak2, p-Stat3) plasma protein band densitometric analyses (D) \* $P < 0.005$ , \*\*\*\* $P < 0.0001$ .
